# Supplementary material
Source: PubMed Central journal article supplement (PMC2772564)

1 **Supplemental Figure Legends:**

2

3 **S1. TGF $\beta$  induces ABCA1 expression in both WT and IRAK1<sup>-/-</sup> BMDMs.** WT and IRAK1<sup>-/-</sup>  
4 BMDM cells were either untreated or treated with TGF $\beta$  (5 ng/ml) followed by Western blot  
5 analysis of cell extracts using ABCA1 specific antibodies. Antibodies against  $\beta$ -actin were used as  
6 the internal loading control.

7 **S2. Effect of the proteasomal inhibitor, MG132, on RAR $\alpha$  nuclear levels in WT BMDMs.**

8 BMDM cells derived from WT mice were either untreated or treated with MG132 alone or in the  
9 presence of LPS. After 2 h incubation, nuclear lysates were prepared and subjected to SDS-PAGE  
10 followed by Western blot analysis with RAR $\alpha$  specific antibodies. The blots were also probed with  
11 LaminB specific antibodies as a loading control.

12 **S3. RXR $\alpha/\beta$  or RAR $\gamma$  Levels are not affected by LPS in either WT or IRAK-1<sup>-/-</sup> cells (S3A).**

13 **In contrast, LPS suppresses LXR $\alpha$  levels in WT, but not IRAK-1<sup>-/-</sup> cells (S3B).** Effect of LPS  
14 on the levels of diverse members of the nuclear receptor family in BMDMs. WT and IRAK-1<sup>-/-</sup>.  
15 BMDMs were treated with 100 ng/ml LPS followed by nuclear protein and whole cell lysate  
16 extraction. The samples were analyzed by immunoblotting using the indicated antibodies. LaminB  
17 specific antibody was used as the loading control.

1.

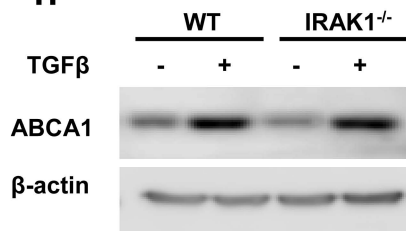

2.

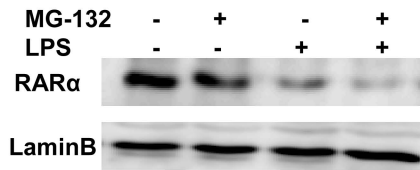

3A.

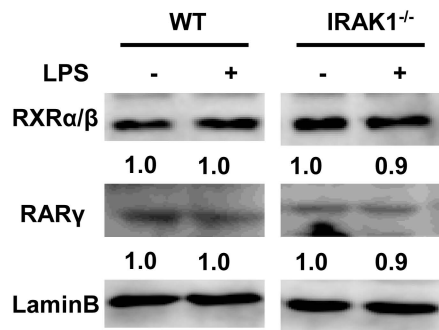

3B.

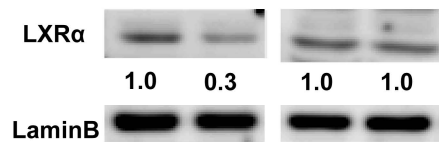

Supplement: supp_29_22_5989__1.pdf [file supp_29_22_5989__1.pdf]
